# Supplementary material for: Endogenous Retroviral Sequences Behave as Putative Enhancers Controlling Gene Expression through HP1-Regulated Long-Range Chromatin Interactions
Source: MDPI journal article supplement (doi:10.3390/cells11152392), 2022-08-03
Supplement: s1 [file s1]

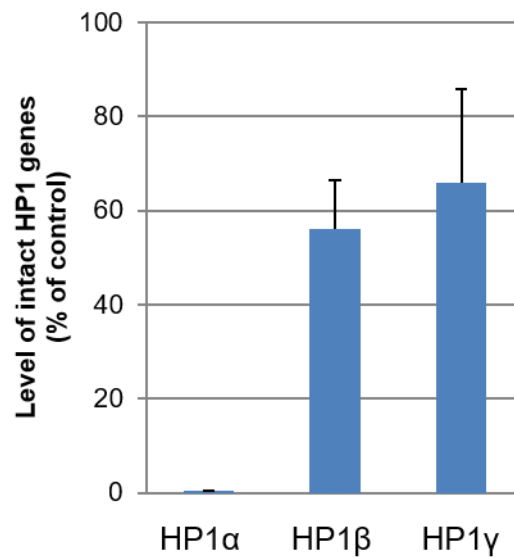

**Figure S1.** HP1 gene inactivation. Rates of HP1α, HP1β and HP1γ gene deletions in mouse liver have been measured on genomic DNA issued from 3C-qPCR experiments to get the best evaluation of our studied samples. Two samples were used for each genotype: 207, 316 for the HP1-TKO and 208, 315 for control mouse livers. Each mouse Control is linked to a mouse HP1-TKO by being born in the same litter. The percentage of remaining unrecombined genes was calculated as follow:  $(\text{HP1TKO}/\text{CTL}) \times 100$ . All data has been quantified in triplicate (error bars are s.e.m., n=2 biological replicates).
