# Supplementary material for: Endogenous Retroviral Sequences Behave as Putative Enhancers Controlling Gene Expression through HP1-Regulated Long-Range Chromatin Interactions
Source: MDPI journal article supplement (doi:10.3390/cells11152392), 2022-08-03
Supplement: s1 [file s1]

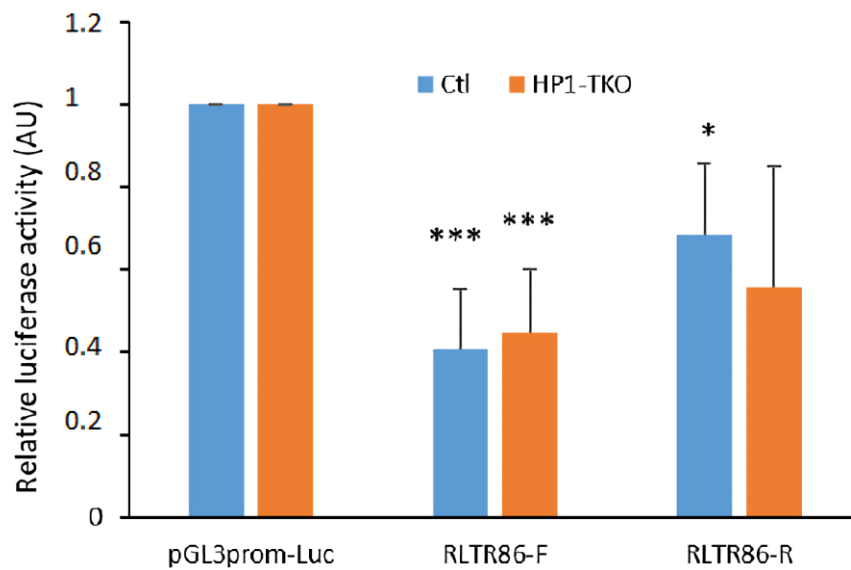

**Supplementary Figure S2:** Enhancer-reporter assay. The *Trim24* associated RLTR-86 ERV was cloned in forward (RLTR86-F) and reverse (RLTR86-R) orientation as compared to the endogenous *Trim24* gene. These constructs were transfected using lipofectamine in two independent control (CTL) and two independent HP1-TKO BMEL cell lines in parallel with a control vector expressing the Renilla luciferase. Error bars indicate s.e.m of at least three independent experiments. The statistical significance of the difference between each construct and the PGL3pro-Luc construct was determined by a student *t*-test.  $p$ -value  $< 0.01$  (\*\*\*) and  $p$ -value  $< 0.05$  (\*). The differences between the CTL and the HP1-TKO cells were not statistically significant for both constructs.
